# Supplementary figures and images for: The Human Milk Microbiota is Modulated by Maternal Diet
Source: MDPI journal article supplement (doi:10.3390/microorganisms7110502), 2019-10-29

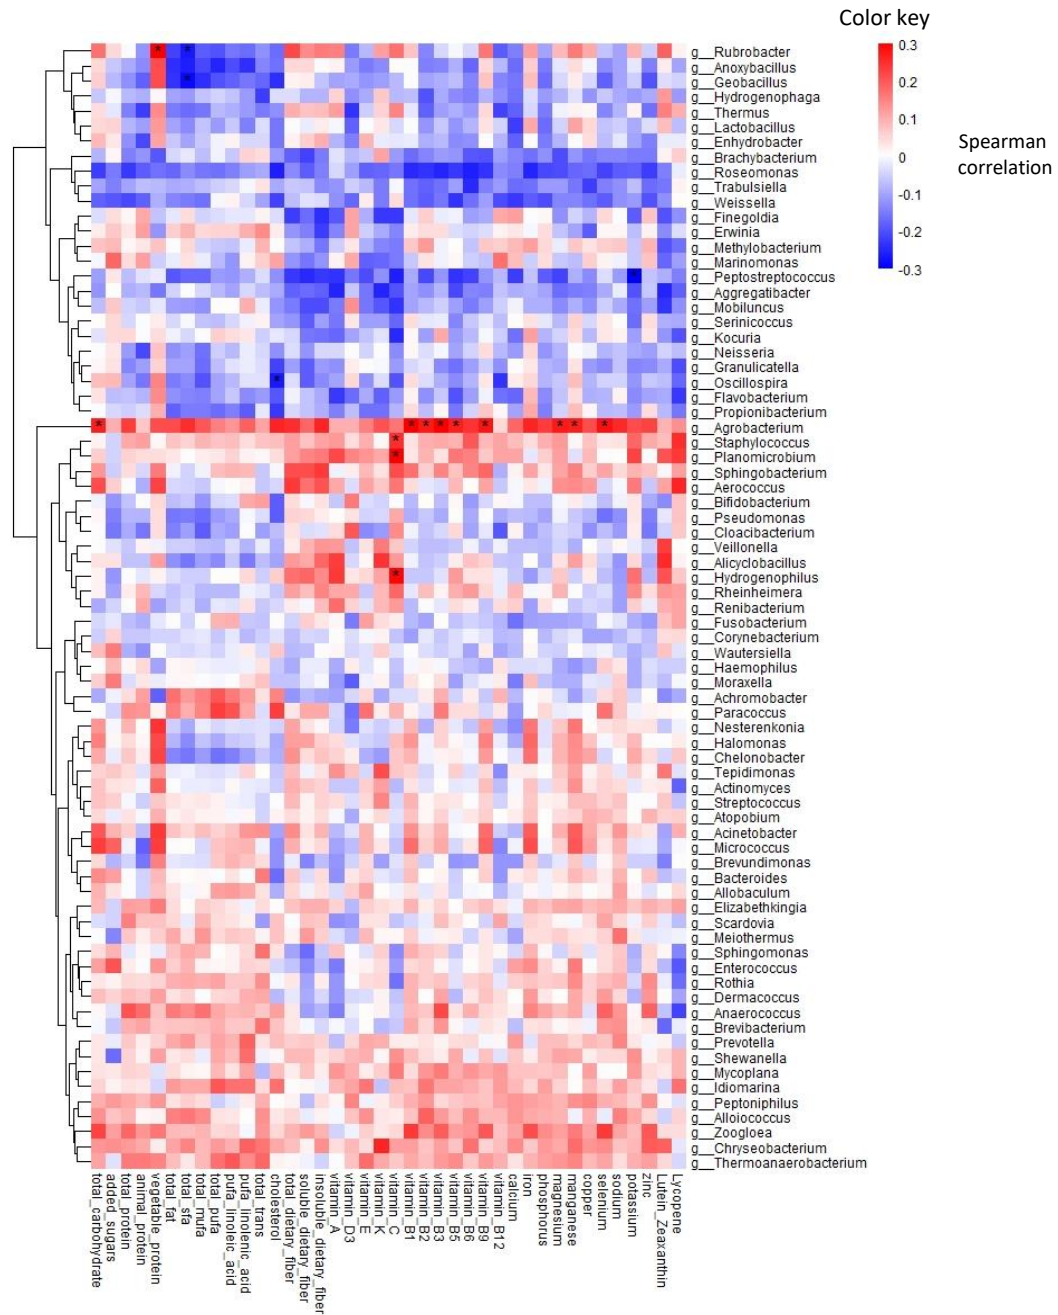

Supplement: s1 [file s1]

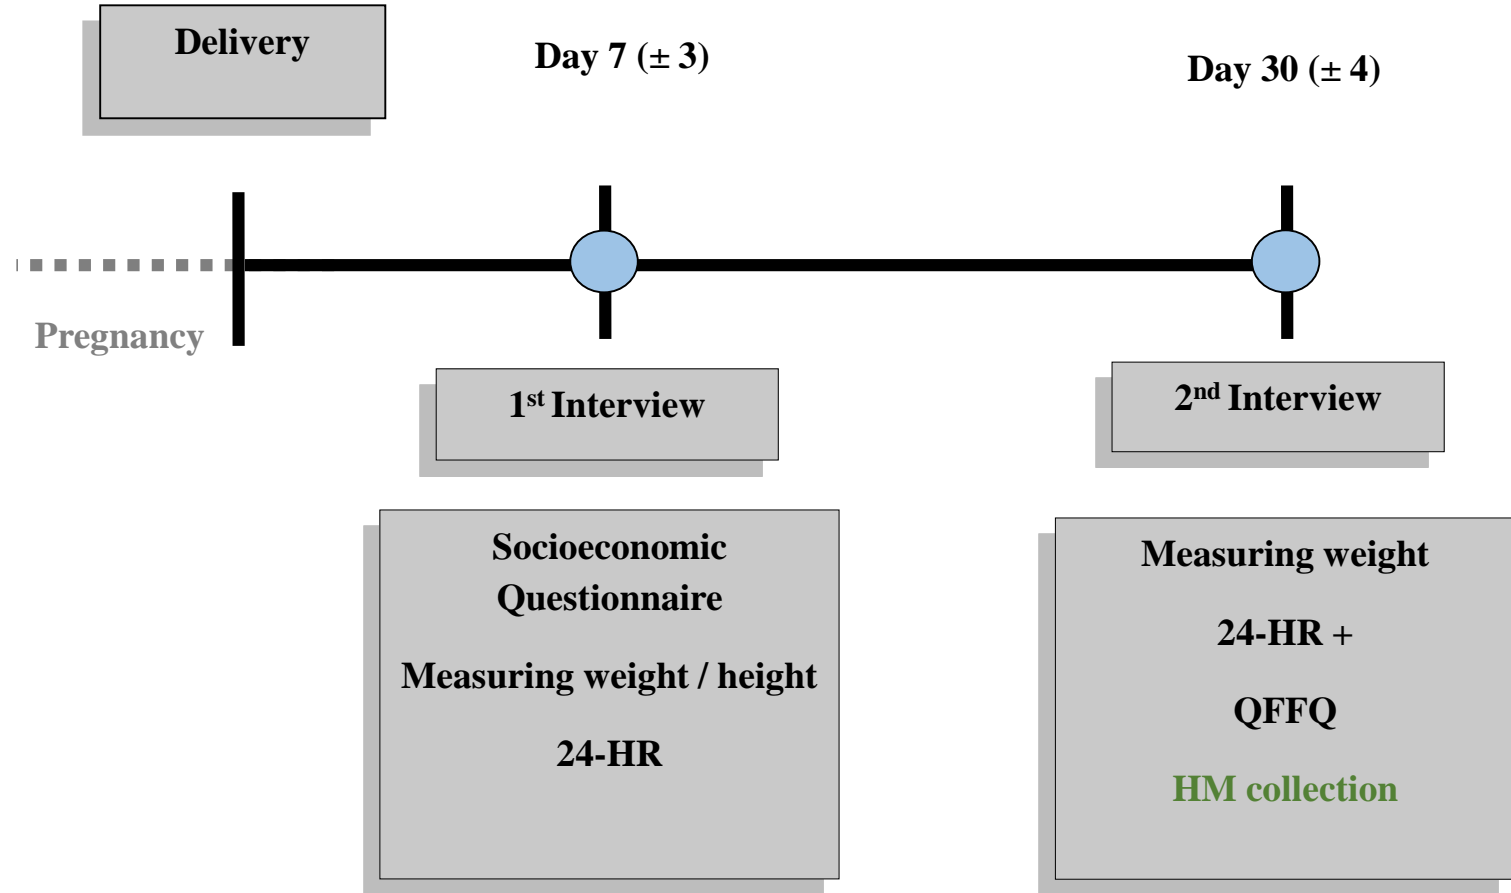

Supplement: s1 [file s1]

Color Key

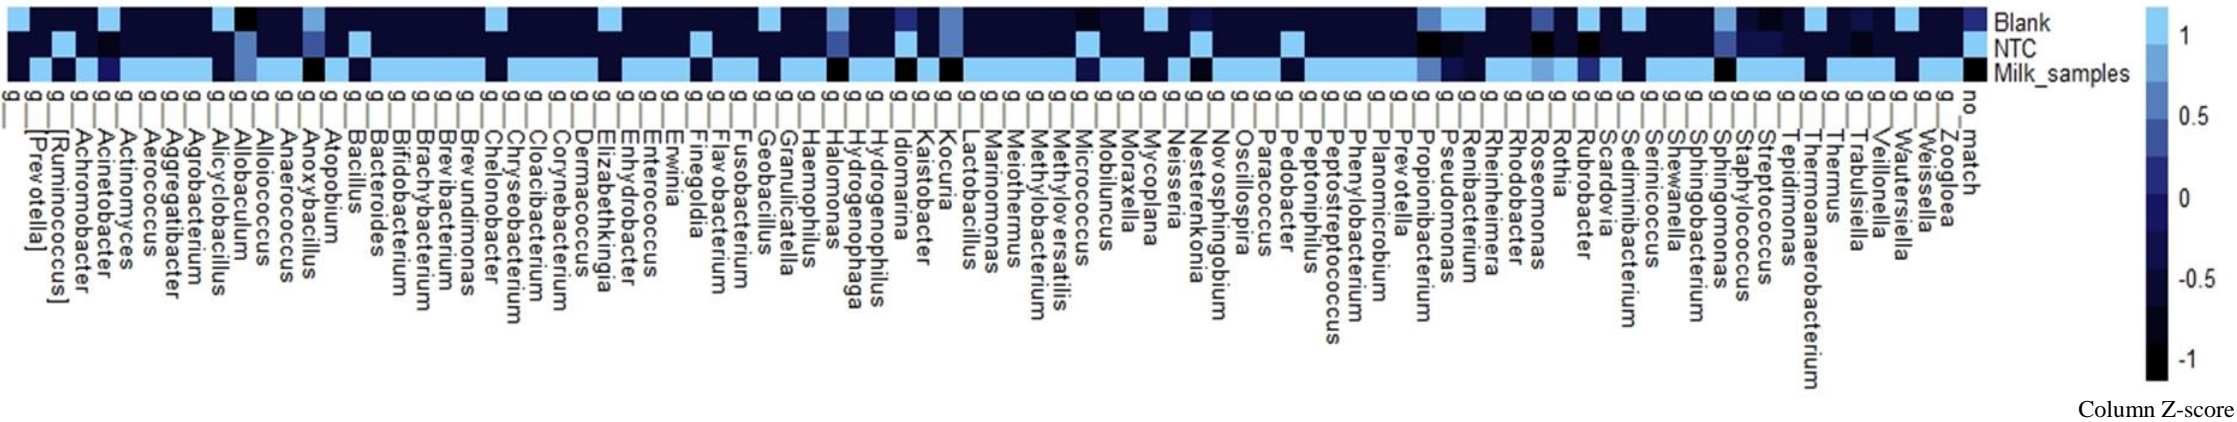

Supplement: s1 [file s1]

**A.**

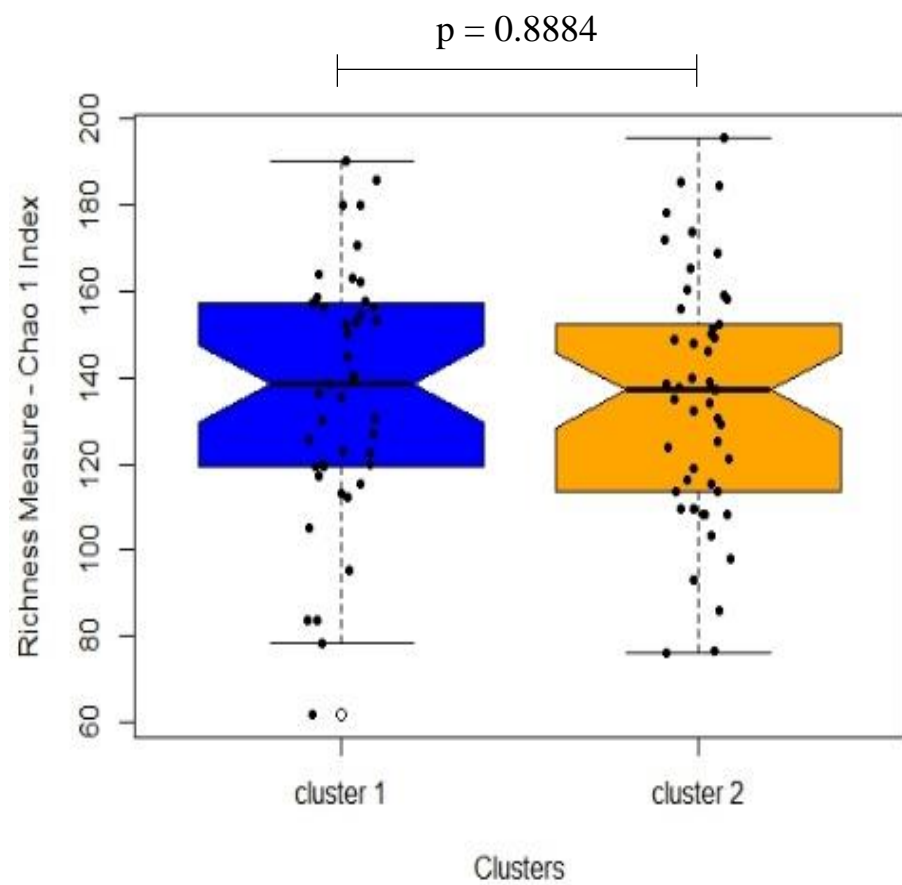

**B.**

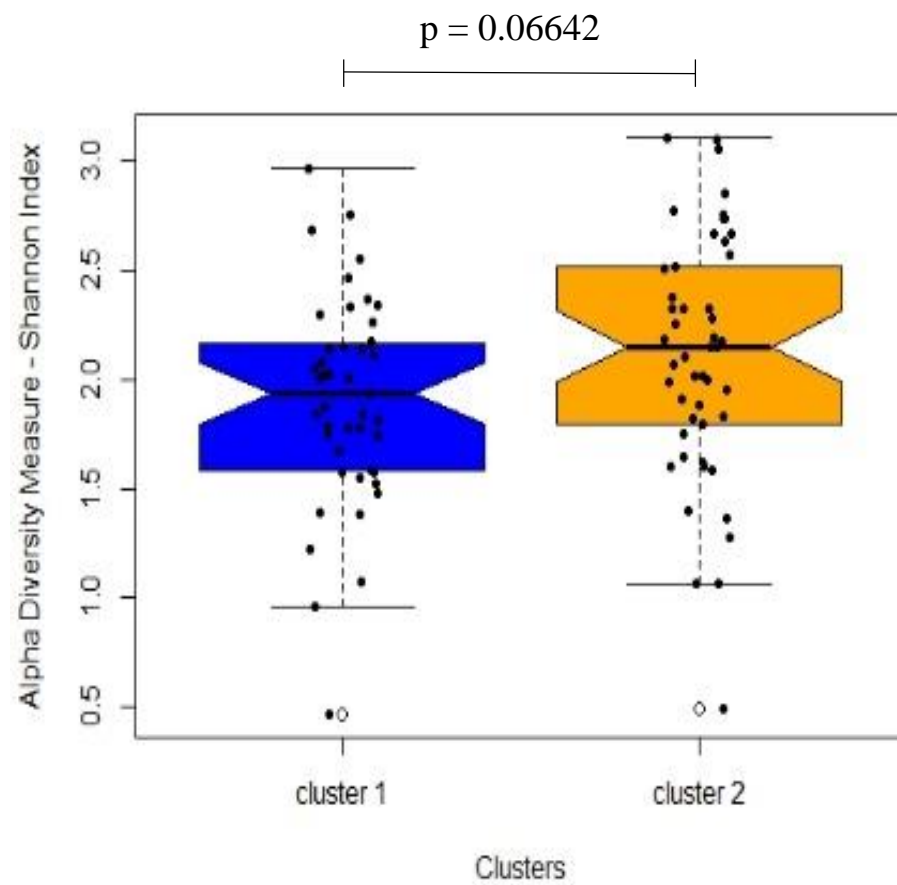

Supplement: s1 [file s1]

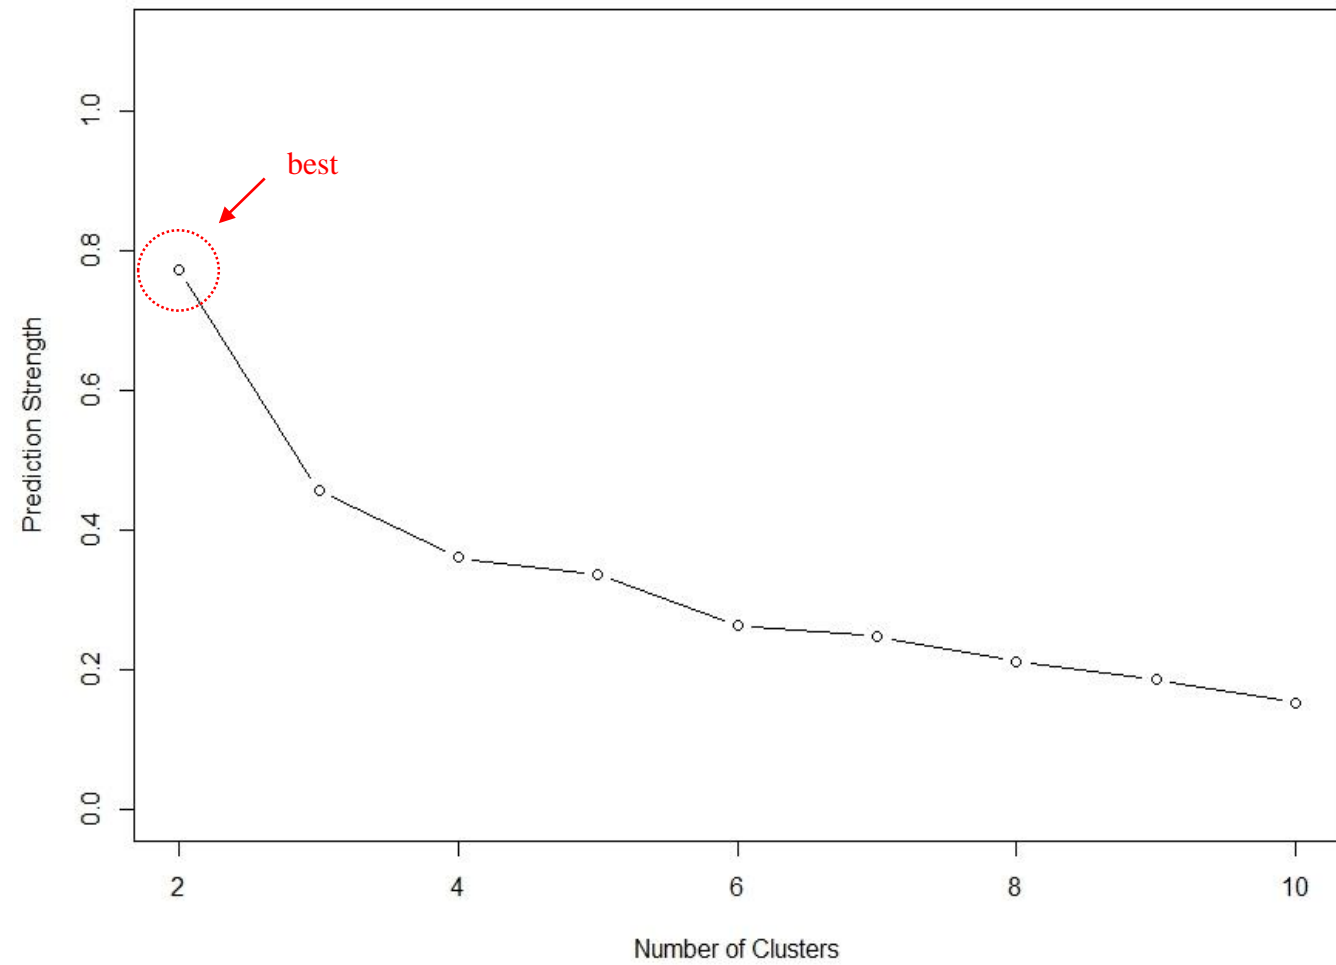

Supplement: s1 [file s1]

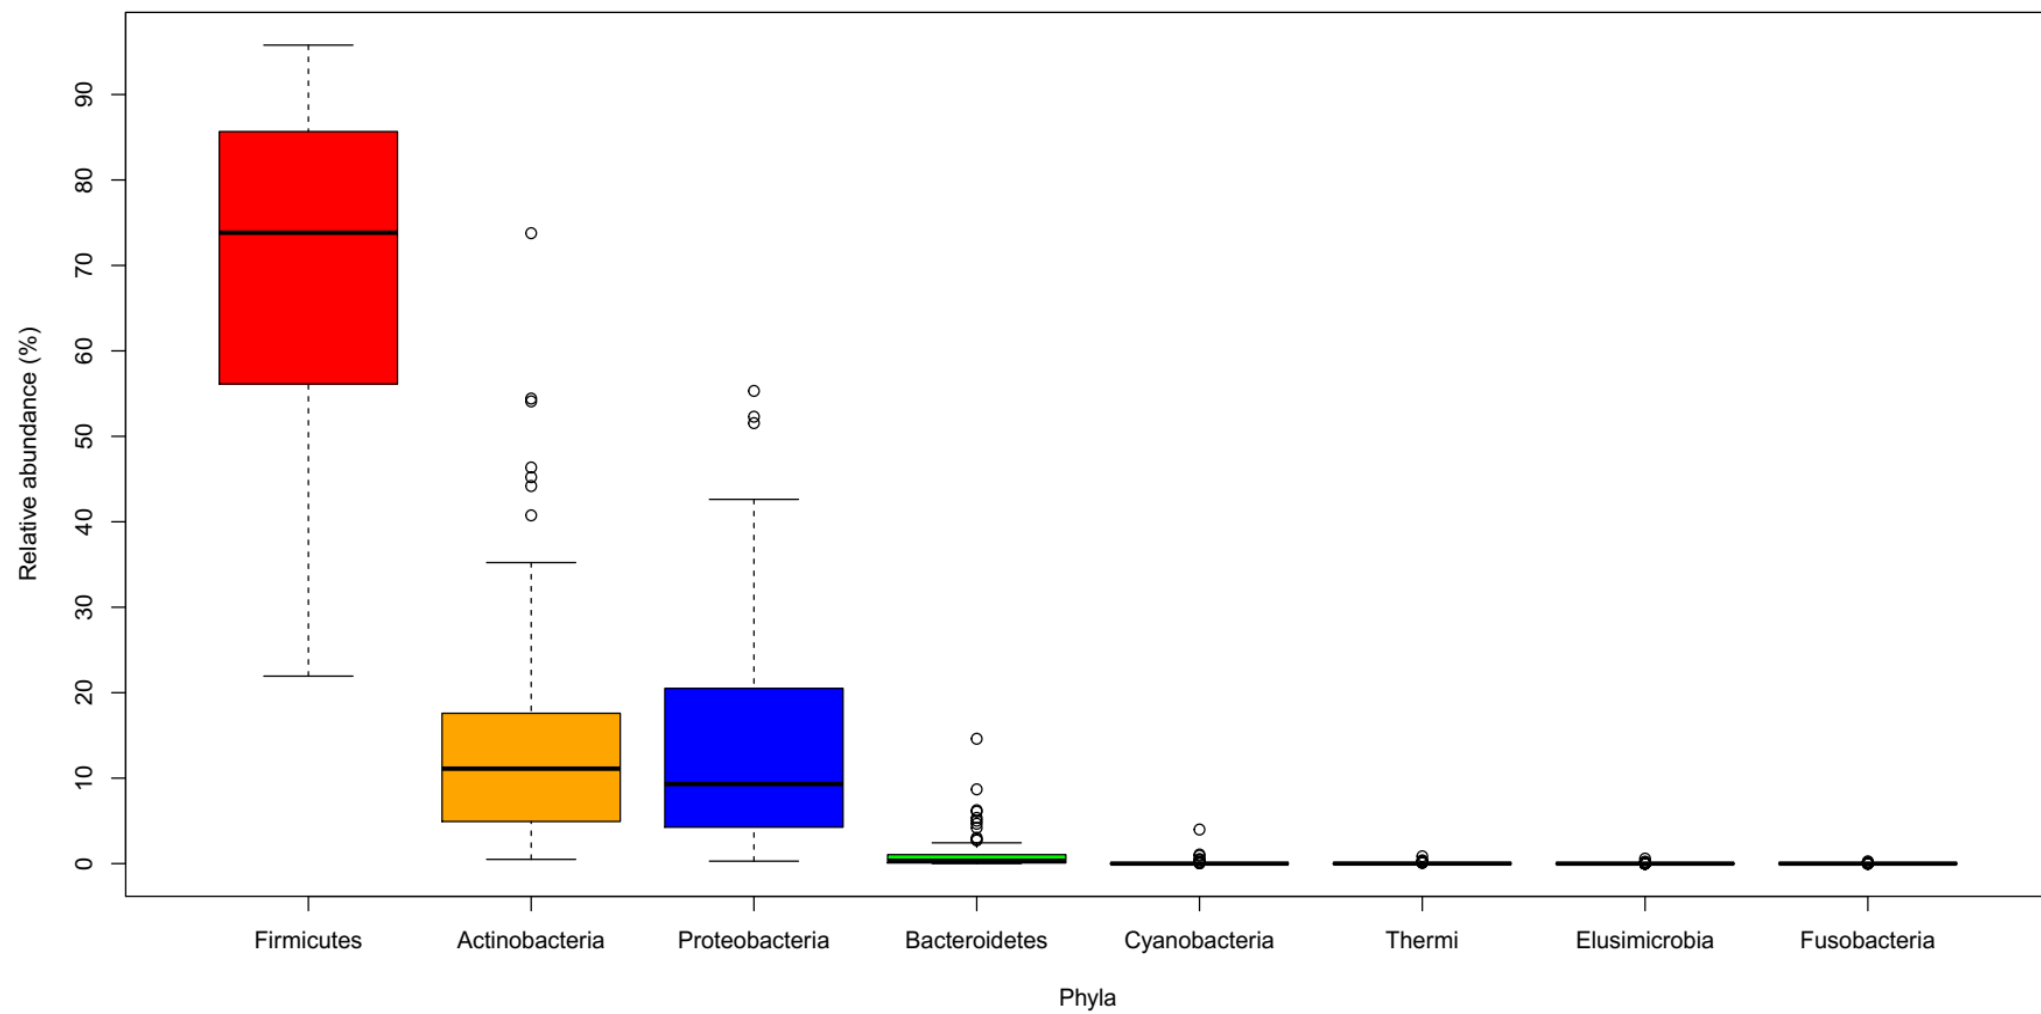

Supplement: s1 [file s1]

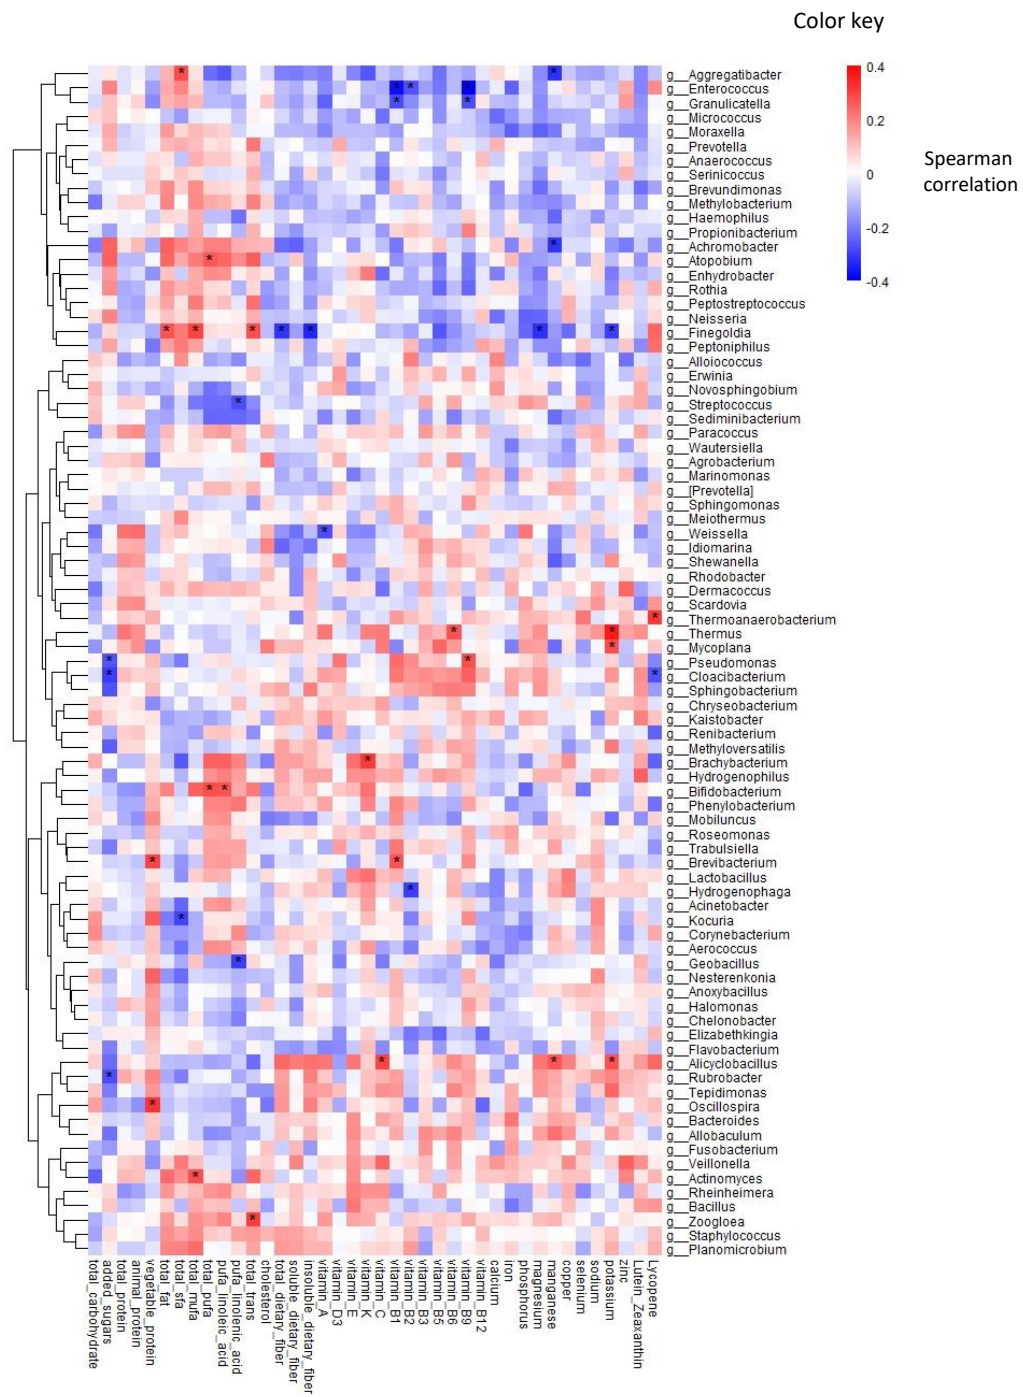

Supplement: s1 [file s1]
